# Supplementary material for: Inter- and intra-molecular condensation patterns of (en)PdII with trans-[a2PtL2]2+ (a = am(m)ine, L = 2-aminopyridine): PtPd3 and Pt2Pd4 species with multiple amide bridges. Unexpected trapping of a pair of nitrate ions by a Pt2Pd4 double coneElectronic supplementary information (ESI) available: 1H NMR spectra of 2a, 4a and 5; views of the crystal structure of 5. See http://www.rsc.org/suppdata/dt/b3/b301708g/
Source: Royal Society of Chemistry journal article supplement (doi:10.1039/b301708g), 2003-01-01
Supplement: b301708g.doc [file b301708g.doc]

**Inter- and intramolecular condensation patterns of enPdII with *trans*-[a2PtL2]2+ (a = am(m)ine, L = 2-aminopyridine): PtPd3 and Pt2Pd4 species with multiple amide bridges. Unexpected trapping of a pair of nitrate ions by a Pt2Pd4 double cone.**

**Bettina Beck,*a* Alexandra Schneider,*a* Eva Freisinger,*a* Dagmar Holthenrich,*a* Andrea Erxleben,*a* Alberto Albinati,*b* Ennio Zangrando,*c* Lucio Randaccio*c* and Bernhard Lippert**,a***

# Supporting Information

Figure S1: 1H NMR spectrum of **2a** in D2O, pD 3.2.

Figure S2: 1H NMR spectrum of **4a** in D2O. pD 6: 1 D spectrum (a) and Pt edited HMQC

spectrum (b). The solvent peat at around 5 ppm has been suppressed.

Figure S3: 1H NMR spectrum of **5** in D2O, pD 8.

Figure S4: Side view (top) and top view (bottom) of Pd2N2 square in **5**.

Figure S5: Stereodiagram of section of packing of **5**.

Figure S6: View along nitrate channel of stacked cations of **5**.
