# Supplementary figures and images for: Inter- and intra-molecular condensation patterns of (en)PdII with trans-[a2PtL2]2+ (a = am(m)ine, L = 2-aminopyridine): PtPd3 and Pt2Pd4 species with multiple amide bridges. Unexpected trapping of a pair of nitrate ions by a Pt2Pd4 double coneElectronic supplementary information (ESI) available: 1H NMR spectra of 2a, 4a and 5; views of the crystal structure of 5. See http://www.rsc.org/suppdata/dt/b3/b301708g/
Source: Royal Society of Chemistry journal article supplement (doi:10.1039/b301708g), 2003-01-01

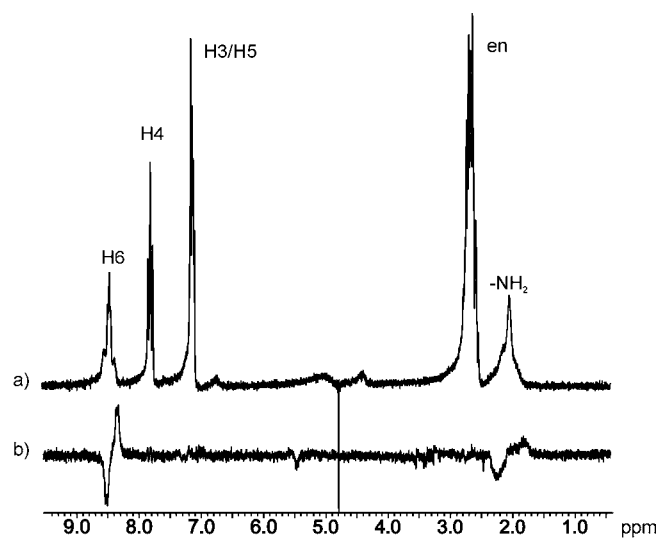

Figure S2

Supplement: b301708g2.pdf [file b301708g2.pdf]

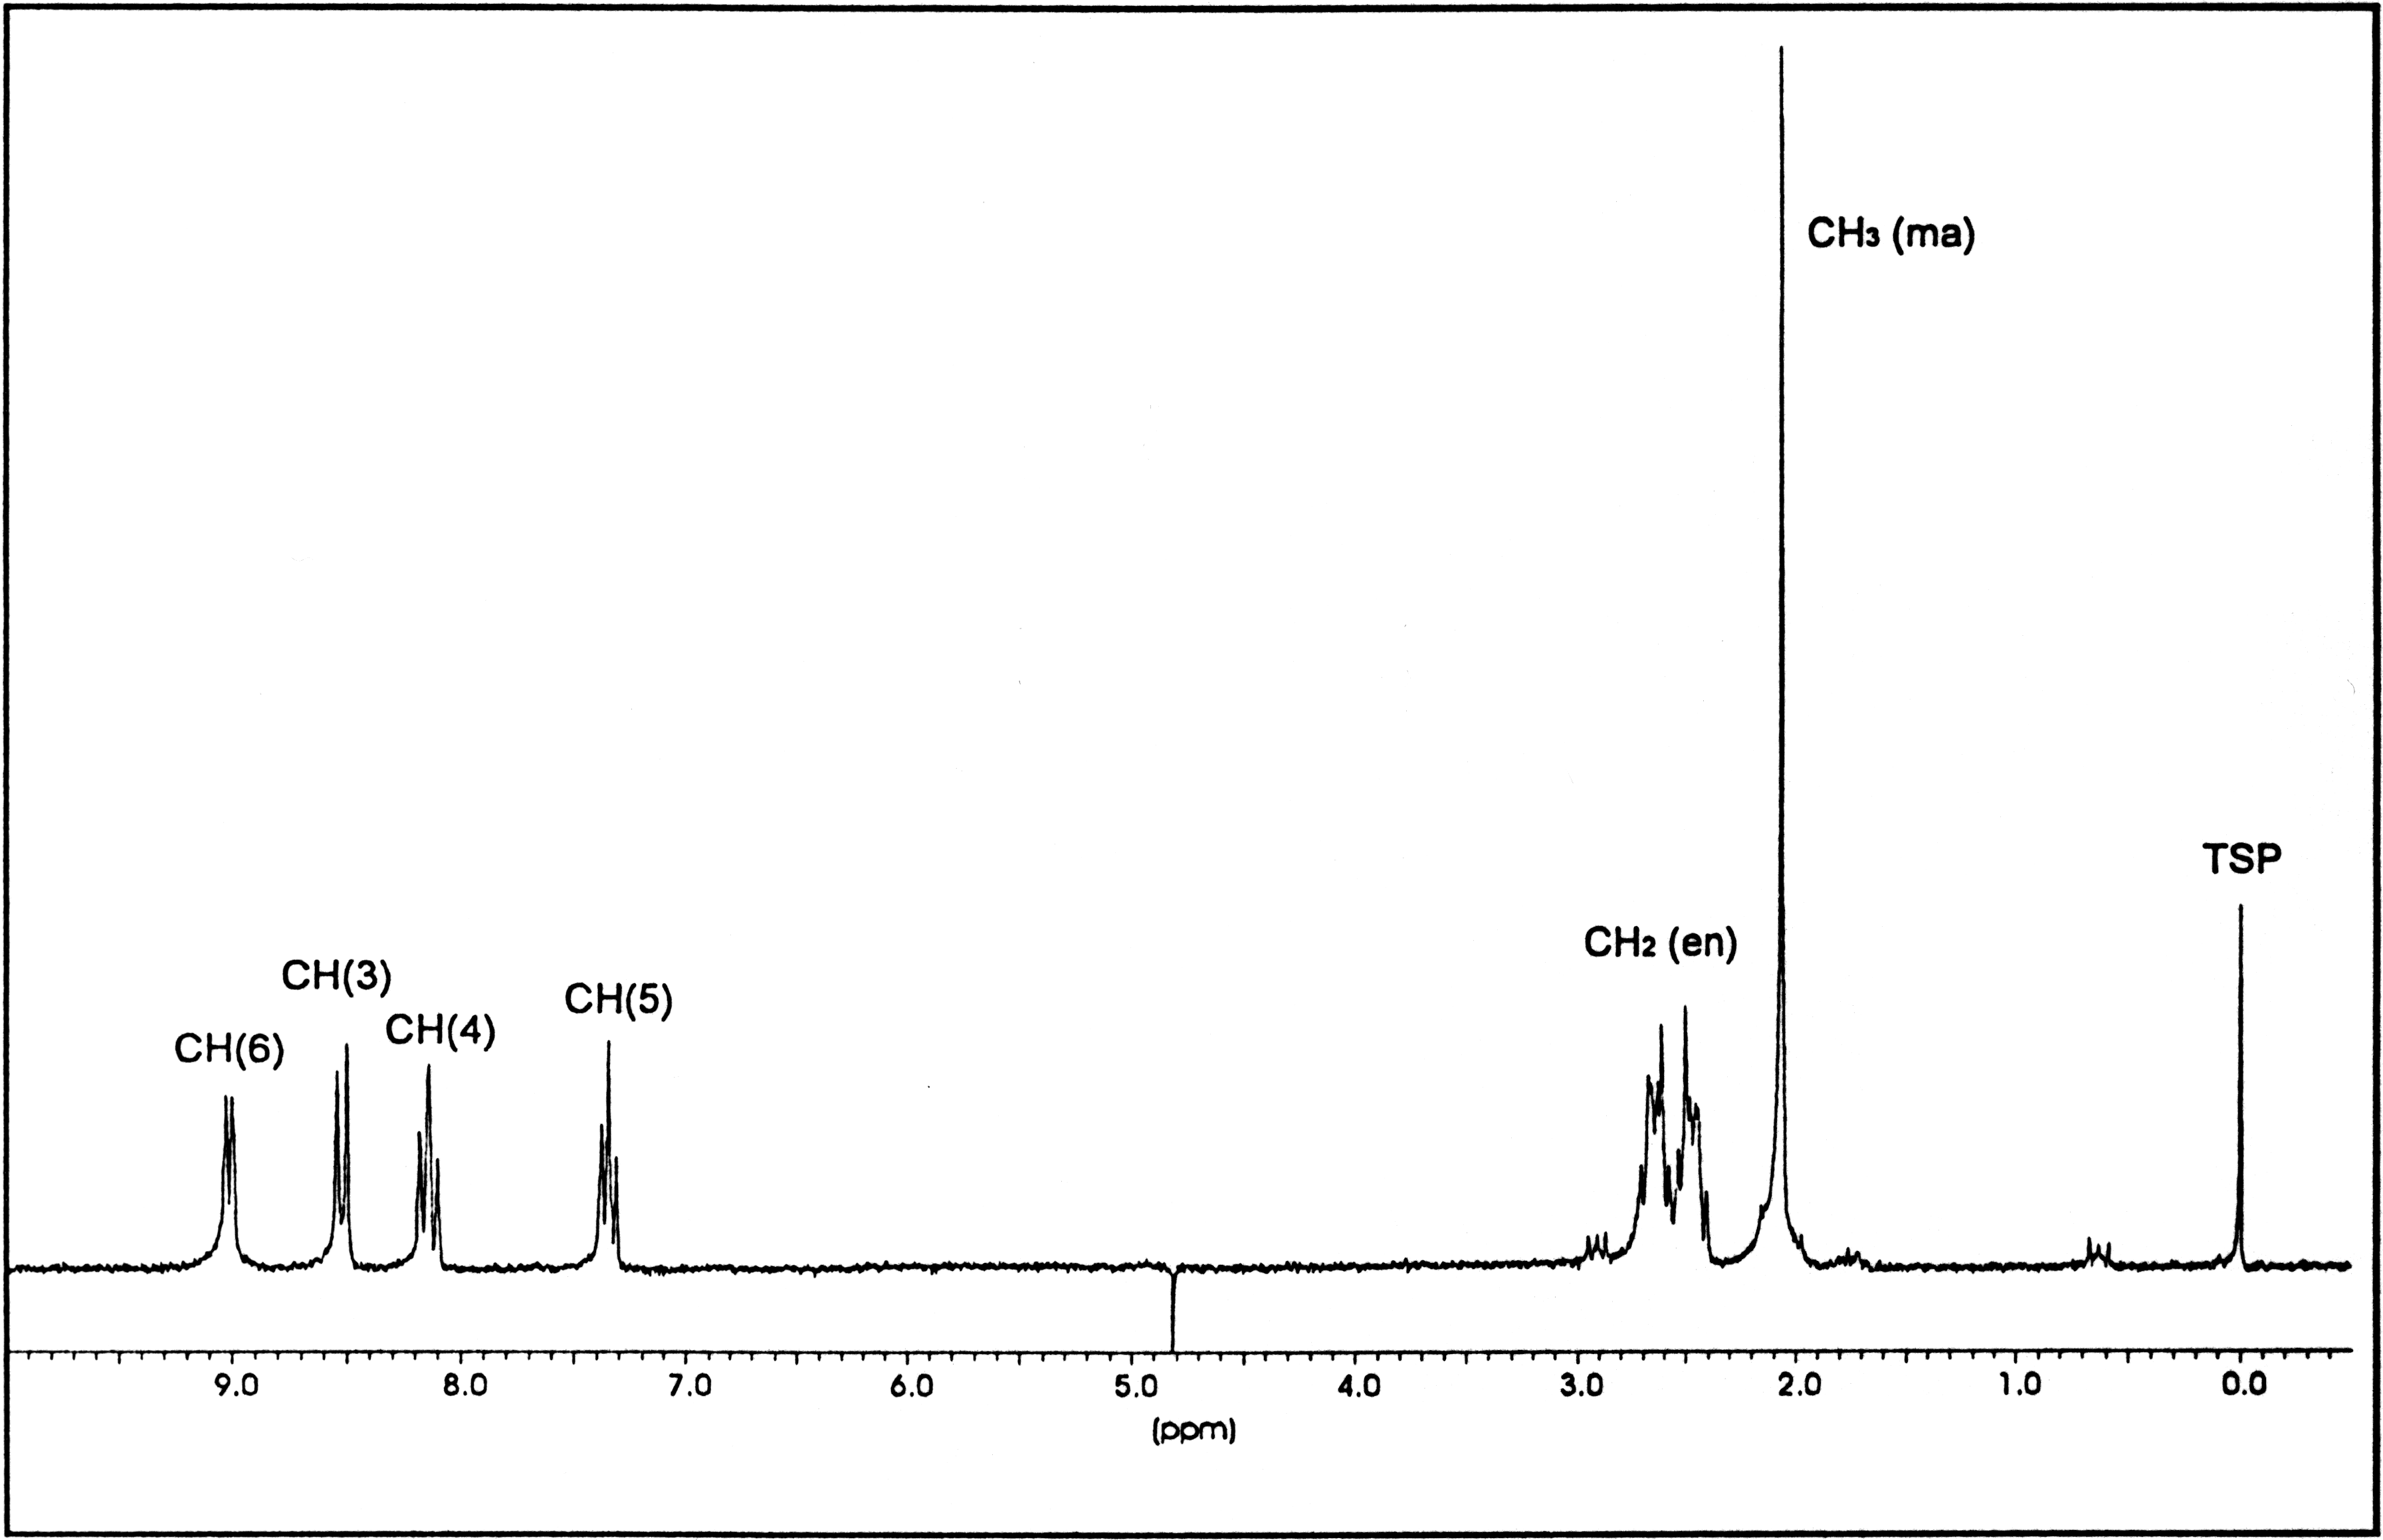


Figure S3

Supplement: b301708g3.doc [file b301708g3.doc]

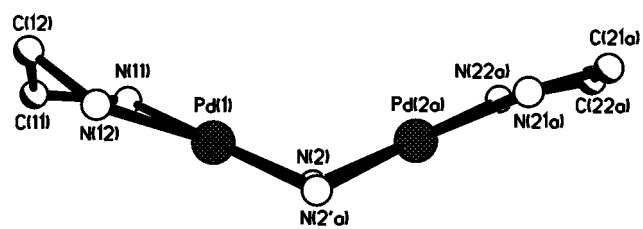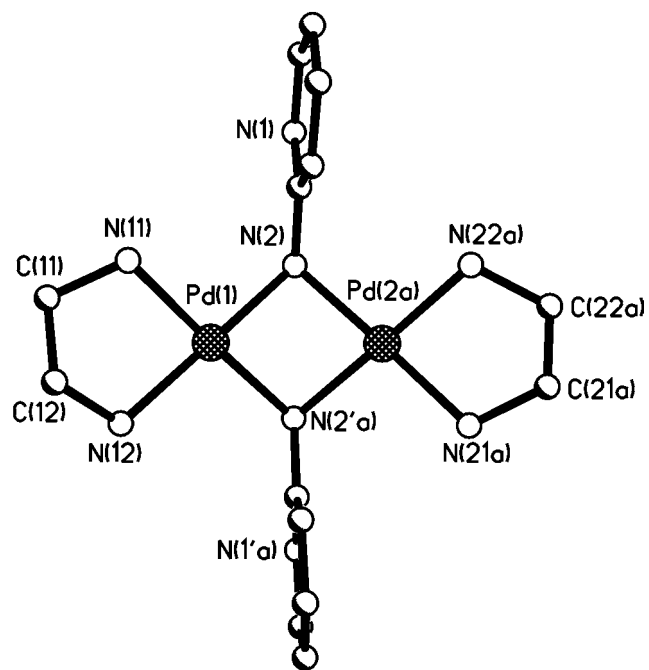

Figure S4

Supplement: b301708g4.pdf [file b301708g4.pdf]

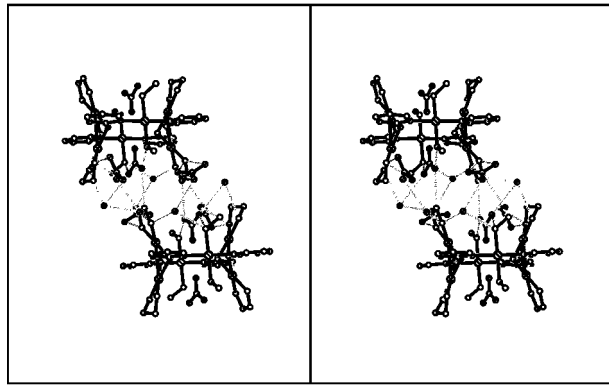

Figure S5

Supplement: b301708g5.pdf [file b301708g5.pdf]

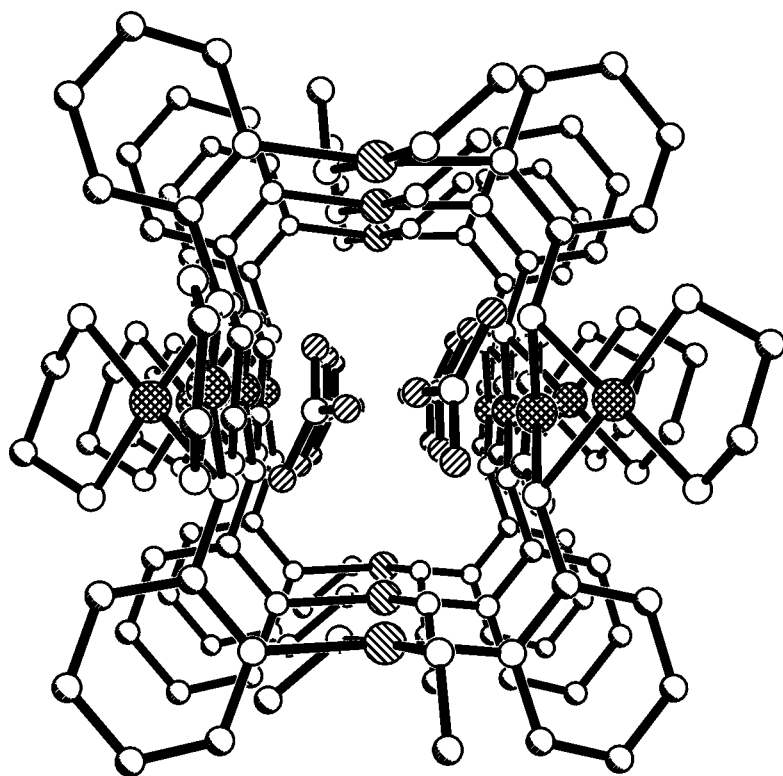

Figure S6

Supplement: b301708g6.pdf [file b301708g6.pdf]
